# Supplementary material
Source: publisher figshare collection journal article supplement (https://springernature.figshare.com/ndownloader/files/13011533)
Supplement: Supplementary file 1 [file 13011533]

Additional file 4 Table 1. Patterns of unemployment reporting as reported in 1998 versus 2006 retrospective data for 1998, individuals reporting contemporaneous unemployment in 1998 and present in 2006

|  | **Dist. 1998** | **% less than six months 1998** | **Mean current unemp. dur. 1998** |
| --- | --- | --- | --- |
| **Aligned** | 16 | 27 | 29 |
| **Unemployed within one year +/-** | 2 | 16 | 13 |
| **Unemployed within two-five years +/-** | 7 | 28 | 32 |
| **Unemployed more than five years +/-** | 3 | 5 | 33 |
| **Never unemployed but have a third status** | 53 | 18 | 39 |
| **Never unemployed no third status** | 18 | 25 | 35 |
| **Total** | 100 | 21 | 35 |
| **N** | 335 | 335 | 335 |

Source: Authors’ calculations based on ELMPS 1998 and ELMPS 2006
